# Supplementary material for: Disparities in Physician Compensation by Gender in Ontario, Canada
Source: PubMed Central journal article supplement (PMC8456385; doi:10.1001/jamanetworkopen.2021.26107), 2021-09-21
Supplement: jamanetwopen-e2126107-s001.pdf [file jamanetwopen-e2126107-s001.pdf]

## Supplemental Online Content

Steffler M, Chami N, Hill S, et al. Disparities in physician compensation by gender in Ontario, Canada. *JAMA Netw Open*. 2021;4(9):e2126107. doi:10.1001/jamanetworkopen.2021.26107

**eTable 1.** Study Population

**eTable 2.** OLS Regression Results on Natural Log of Billings for All Physicians

**eTable 3.** Female-to-Male Payment Gaps by Category

This supplemental material has been provided by the authors to give readers additional information about their work.

**eTable 1.** Study Population

| <b>Inclusion/ Exclusion Criteria</b>                                       | <b>Number Removed</b> | <b>Total Remaining</b> | <b>% of FY 2017 Billers Removed</b> |
|----------------------------------------------------------------------------|-----------------------|------------------------|-------------------------------------|
| Any physician with billing records in FY 2017                              | -                     | 31,798                 | -                                   |
| <i>Exclusions:</i>                                                         |                       |                        |                                     |
| <i>Missing Record of "Sex" on File</i>                                     | 19                    | 31,779                 | 0.1%                                |
| <i>Missing or Invalid Ontario Postal Code</i>                              | 9                     | 31,770                 | 0.0%                                |
| <i>Missing Individual Income Information*</i>                              | 253                   | 31,517                 | 0.8%                                |
| <i>Anomalous Billing Information (Billings total <math>\leq</math>\$0)</i> | 36                    | 31,481                 | 0.1%                                |
| Final Study Population                                                     | -                     | 31,481                 | 1.0%                                |
|                                                                            |                       |                        |                                     |

\*Fees from Telehealth, Laboratory Medicine, and Community Palliative on-call codes were excluded from the analysis. Cases where billings could not reasonably be attributed to individuals were also excluded.

**eTable 2.** OLS Regression Results on Natural Log of Billings<sup>a,b</sup> for All Physicians

|                                                          |                                                                            | Annual Unadjusted<br>(95% CI) | P value | Daily Unadjusted<br>(95% CI) | P value | Daily Within Specialty <sup>c</sup><br>(95% CI) | P value | Daily Adjusted <sup>c</sup><br>(95% CI) | P value |
|----------------------------------------------------------|----------------------------------------------------------------------------|-------------------------------|---------|------------------------------|---------|-------------------------------------------------|---------|-----------------------------------------|---------|
| <b>Physician Sex</b>                                     | Female<br>ref: Male                                                        | 0.672 (0.654-0.692)           | p<0.001 | 0.775 (0.762-0.788)          | p<0.001 | 0.832 (0.819-0.844)                             | p<0.001 | 0.865 (0.852-0.877)                     | p<0.001 |
| <b>Working Characteristics</b>                           | Years since graduation                                                     |                               |         |                              |         |                                                 |         | 1.023 (1.021-1.025)                     | p<0.001 |
|                                                          | Years since graduation, squared                                            |                               |         |                              |         |                                                 |         | 1.000 (1.000-1.000)                     | p<0.001 |
|                                                          | Part-time status (<3 days/week)                                            |                               |         |                              |         |                                                 |         | 0.750 (0.735-0.765)                     | p<0.001 |
|                                                          | Weekend days worked as a percentage of total days worked annually          |                               |         |                              |         |                                                 |         | 1.005(1.004-1.006)                      | p<0.001 |
|                                                          | Days with after-hours worked as a percentage of total days worked annually |                               |         |                              |         |                                                 |         | 1.010 (1.009-1.011)                     | p<0.001 |
|                                                          | Holidays worked as a percentage of total days worked annually              |                               |         |                              |         |                                                 |         | 1.008 (1.001-1.014)                     | 0.02    |
| <b>Practice Setting</b>                                  | Mixed practice<br>ref: 95%+ Hospital based                                 |                               |         |                              |         |                                                 |         | 0.932 (0.909-0.956)                     | p<0.001 |
|                                                          | 95%+ Private clinic<br>ref: 95%+ Hospital based                            |                               |         |                              |         |                                                 |         | 0.969 (0.952-0.986)                     | 0.001   |
| <b>Academic Status</b>                                   | Received any academic funding                                              |                               |         |                              |         |                                                 |         | 1.037 (1.016-1.060)                     | 0.001   |
| <b>Rurality (based on the Rurality Index of Ontario)</b> | Semi-urban (RIO=1-39)<br>ref: Urban (RIO=0)                                |                               |         |                              |         |                                                 |         | 1.048 (1.033-1.064)                     | p<0.001 |
|                                                          | Rural (RIO=40-100)<br>ref: Urban (RIO=0)                                   |                               |         |                              |         |                                                 |         | 0.852 (0.821-0.884)                     | p<0.001 |
|                                                          | RIO Missing<br>ref: Urban (RIO=0)                                          |                               |         |                              |         |                                                 |         | 0.924 (0.877-0.973)                     | 0.003   |
| <b>R-squared</b>                                         |                                                                            | 0.02                          |         | 0.03                         |         | 0.28                                            |         | 0.36                                    |         |
| <b>N</b>                                                 |                                                                            | 31,481                        |         | 31,481                       |         | 31,481                                          |         | 31,481                                  |         |

Notes:

- a) Exponentiated coefficients are reported.
- b) Findings are based on gross clinical payments in FY 2017 and do not consider overhead or earnings from non-public sources.
- c) Daily Adjusted and Daily Within Specialty results include specialty-level fixed effects.

**eTable 3.** Female-to-Male Payment Gaps<sup>a,b</sup> by Category

|                                                              |                        | <b>Annual<br/>Unadjusted<br/>(95% CI)</b> | <i>P</i> value | <b>Daily<br/>Unadjusted<br/>(95% CI)</b> | <i>P</i> value | <b>Daily<br/>Adjusted<sup>c</sup><br/>(95% CI)</b> | <i>P</i> value |
|--------------------------------------------------------------|------------------------|-------------------------------------------|----------------|------------------------------------------|----------------|----------------------------------------------------|----------------|
| <b>Overall</b>                                               |                        | 32.8% (30.8%-34.6%)                       | p<0.001        | 22.5% (21.2%-23.8%)                      | p<0.001        | 13.5% (12.3%-14.8%)                                | p<0.001        |
| <b>Specialty</b>                                             | Family Medicine        | 32.8% (29.8%-35.7%)                       | p<0.001        | 22.3% (20.0%-24.4%)                      | p<0.001        | 16.8% (14.6%-18.9%)                                | p<0.001        |
|                                                              | All Other Specialties  | 29.7% (27.0%-32.3%)                       | p<0.001        | 16.9% (15.2%-18.5%)                      | p<0.001        | 10.1% (8.6%-11.6%)                                 | p<0.001        |
| <b>Family Practice Payment<br/>Model</b>                     | Fee-for-Service        | 42.4% (36.3%-48.0%)                       | p<0.001        | 31.8% (27.2%-36.2%)                      | p<0.001        | 22.8% (17.3%-28.0%)                                | p<0.001        |
|                                                              | Enhanced FFS           | 28.5% (25.0%-31.8%)                       | p<0.001        | 19.1% (16.5%-21.7%)                      | p<0.001        | 17.1% (14.4%-19.7%)                                | p<0.001        |
|                                                              | Capitation (FHO & FHN) | 29.1% (27.2%-31.0%)                       | p<0.001        | 17.5% (15.7%-19.4%)                      | p<0.001        | 13.4% (11.3%-15.5%)                                | p<0.001        |
|                                                              | Other PEM              | 26.5% (3.4%-44.1%)                        | 0.03           | 17.4% (-1.8%-32.9%)                      | 0.07           | 15.1% (-0.4%-28.2%)                                | 0.06           |
| <b>Payment Model –<br/>Excluding Family Practice</b>         | Fee-For-Service        | 32.8% (28.9%-36.4%)                       | p<0.001        | 19.1% (16.8%-21.4%)                      | p<0.001        | 11.6% (9.5%-13.7%)                                 | p<0.001        |
|                                                              | APP Funding (Any)      | 27.0% (23.6%-30.2%)                       | p<0.001        | 15.3% (13.2%-17.3%)                      | p<0.001        | 8.0% (6.1%-10.0%)                                  | p<0.001        |
| <b>Practice Setting</b>                                      | Hospital               | 26.7% (22.8%-30.4%)                       | p<0.001        | 15.9% (13.7%-18.2%)                      | p<0.001        | 8.3% (6.3%-10.3%)                                  | p<0.001        |
|                                                              | Private Office         | 28.4% (24.6%-32.1%)                       | p<0.001        | 19.8% (17.2%-22.4%)                      | p<0.001        | 17.2% (14.7%-19.6%)                                | p<0.001        |
|                                                              | Mixed                  | 39.1% (36.8%-41.4%)                       | p<0.001        | 27.3% (25.4%-29.1%)                      | p<0.001        | 14.6% (12.7%-16.5%)                                | p<0.001        |
| <b>Practice Setting –<br/>Excluding Family Practice</b>      | Hospital               | 24.3% (20.1%-28.3%)                       | p<0.001        | 13.0% (10.6%-15.3%)                      | p<0.001        | 6.9% (4.9%-8.8%)                                   | p<0.001        |
|                                                              | Private Office         | 26.0% (17.0%-34.0%)                       | p<0.001        | 15.2% (9.8%-20.2%)                       | p<0.001        | 13.8% (9.0%-18.4%)                                 | p<0.001        |
|                                                              | Mixed                  | 35.4% (32.3%-38.3%)                       | p<0.001        | 21.8% (19.6%-24.0%)                      | p<0.001        | 12.7% (10.4%-14.9%)                                | p<0.001        |
| <b>Rurality (based on the<br/>Rurality Index of Ontario)</b> | Urban (RIO=0)          | 32.5% (29.9%-35.0%)                       | p<0.001        | 21.7% (19.9%-23.5%)                      | p<0.001        | 12.1% (10.4%-13.9%)                                | p<0.001        |
|                                                              | Semi-Urban (RIO=1-39)  | 33.6% (30.6%-36.4%)                       | p<0.001        | 23.8% (21.9%-25.7%)                      | p<0.001        | 16.5% (14.6%-18.4%)                                | p<0.001        |
|                                                              | Rural (RIO=40-100)     | 23.6% (10.2%-35.0%)                       | 0.001          | 19.2% (11.7%-26.2%)                      | p<0.001        | 8.0% (1.3%-14.3%)                                  | 0.02           |

Notes:

a) Payment Gap is expressed as one minus the ratio of female to male billings. Exponentiated coefficients are reported.

b) Findings are based on gross clinical payments in FY 2017 and do not consider overhead or earnings from non-public sources.

c) Daily Adjusted controls for tenure, specialty, primary care payment model, part-time status, after hours work, holiday work, weekend work, practice setting, academic physician status and rurality.
